# Supplementary material for: Biomarkers of Development of Immunity and Allergic Diseases in Farming and Non-farming Lifestyle Infants: Design, Methods and 1 Year Outcomes in the “Zooming in to Old Order Mennonites” Birth Cohort Study
Source: Front Pediatr. 2022 Jul 6;10:916184. doi: 10.3389/fped.2022.916184 (PMC9299374; doi:10.3389/fped.2022.916184)
Supplement: Supplementary file 2 [file Table_2.XLSX]

## Sheet: Table 3
Table 3. Specific IgE Levels at 12 Months of Age
Group	Study ID	Antigen	IgE (kU/L)
OOM	4	cat	<0.30
OOM	6	cat	<0.30
OOM	10	cat	<0.30
OOM	13	cat	<0.30
OOM	15	cat	<0.30
OOM	18	cat	<0.30
OOM	20	cat	<0.30
OOM	21	cat	<0.30
OOM	23	cat	<0.30
OOM	24	cat	<0.30
OOM	26	cat	<0.30
OOM	28	cat	<0.30
OOM	29	cat	<0.30
OOM	31	cat	0.36
OOM	32	cat	<0.30
OOM	33	cat	<0.30
OOM	35	cat	<0.30
OOM	38	cat	<0.30
OOM	41	cat	<0.30
OOM	42	cat	<0.30
OOM	43	cat	<0.30
OOM	44	cat	<0.30
OOM	45	cat	<0.30
OOM	47	cat	<0.30
OOM	48	cat	<0.30
OOM	49	cat	<0.30
OOM	50	cat	<0.30
OOM	51	cat	<0.30
OOM	53	cat	<0.30
OOM	55	cat	<0.30
OOM	60	cat	<0.30
OOM	62	cat	<0.30
OOM	68	cat	<0.30
OOM	69	cat	<0.30
OOM	70	cat	<0.30
OOM	72	cat	<0.30
OOM	74	cat	<0.30
OOM	77	cat	<0.30
OOM	78	cat	<0.30
OOM	81	cat	<0.30
OOM	86	cat	<0.30
OOM	88	cat	<0.30
OOM	90	cat	<0.30
OOM	91	cat	<0.30
OOM	92	cat	<0.30
OOM	93	cat	<0.30
OOM	98	cat	<0.30
OOM	102	cat	<0.30
OOM	103	cat	<0.30
OOM	104	cat	<0.30
ROC	201	cat	<0.30
ROC	205	cat	<0.30
ROC	208	cat	<0.30
ROC	211	cat	<0.30
ROC	213	cat	1.2
ROC	214	cat	<0.30
ROC	215	cat	<0.30
ROC	218	cat	<0.30
ROC	219	cat	<0.30
ROC	220	cat	<0.30
ROC	221	cat	<0.30
ROC	223	cat	<0.30
ROC	227	cat	<0.30
ROC	228	cat	<0.30
ROC	229	cat	<0.30
ROC	232	cat	<0.30
ROC	239	cat	<0.30
ROC	240	cat	<0.30
ROC	243	cat	<0.30
ROC	244	cat	<0.30
ROC	245	cat	<0.30
ROC	246	cat	<0.30
ROC	249	cat	<0.30
ROC	254	cat	<0.30
ROC	256	cat	<0.30
ROC	261	cat	<0.30
ROC	264	cat	<0.30
ROC	265	cat	<0.30
ROC	266	cat	<0.30
ROC	267	cat	<0.30
ROC	269	cat	<0.30
ROC	271	cat	<0.30
ROC	272	cat	<0.30
ROC	275	cat	<0.30
ROC	279	cat	<0.30
ROC	280	cat	<0.30
ROC	282	cat	<0.30
ROC	285	cat	<0.30
ROC	287	cat	<0.30
ROC	289	cat	<0.30
ROC	290	cat	<0.30
ROC	291	cat	<0.30
ROC	292	cat	<0.30
ROC	295	cat	<0.30
ROC	296	cat	<0.30
ROC	297	cat	<0.30
OOM	4	dog	<0.30
OOM	6	dog	<0.30
OOM	10	dog	<0.30
OOM	13	dog	<0.30
OOM	15	dog	<0.30
OOM	18	dog	<0.30
OOM	20	dog	<0.30
OOM	21	dog	<0.30
OOM	23	dog	<0.30
OOM	24	dog	<0.30
OOM	26	dog	<0.30
OOM	28	dog	<0.30
OOM	29	dog	<0.30
OOM	31	dog	<0.30
OOM	32	dog	<0.30
OOM	33	dog	<0.30
OOM	35	dog	<0.30
OOM	38	dog	<0.30
OOM	41	dog	<0.30
OOM	42	dog	<0.30
OOM	43	dog	<0.30
OOM	44	dog	<0.30
OOM	45	dog	<0.30
OOM	47	dog	<0.30
OOM	48	dog	<0.30
OOM	49	dog	<0.30
OOM	50	dog	<0.30
OOM	51	dog	<0.30
OOM	53	dog	<0.30
OOM	55	dog	<0.30
OOM	60	dog	<0.30
OOM	62	dog	<0.30
OOM	68	dog	<0.30
OOM	69	dog	<0.30
OOM	70	dog	<0.30
OOM	72	dog	<0.30
OOM	74	dog	<0.30
OOM	77	dog	<0.30
OOM	78	dog	<0.30
OOM	81	dog	<0.30
OOM	86	dog	<0.30
OOM	88	dog	<0.30
OOM	90	dog	<0.30
OOM	91	dog	<0.30
OOM	92	dog	<0.30
OOM	93	dog	<0.30
OOM	98	dog	<0.30
OOM	102	dog	<0.30
OOM	103	dog	<0.30
OOM	104	dog	<0.30
ROC	201	dog	<0.30
ROC	205	dog	<0.30
ROC	208	dog	<0.30
ROC	211	dog	<0.30
ROC	213	dog	<0.30
ROC	214	dog	<0.30
ROC	215	dog	<0.30
ROC	218	dog	<0.30
ROC	219	dog	<0.30
ROC	220	dog	<0.30
ROC	221	dog	<0.30
ROC	223	dog	0.6
ROC	227	dog	<0.30
ROC	228	dog	<0.30
ROC	229	dog	<0.30
ROC	232	dog	<0.30
ROC	239	dog	<0.30
ROC	240	dog	<0.30
ROC	243	dog	<0.30
ROC	244	dog	<0.30
ROC	245	dog	<0.30
ROC	246	dog	<0.30
ROC	249	dog	<0.30
ROC	254	dog	<0.30
ROC	256	dog	<0.30
ROC	261	dog	<0.30
ROC	264	dog	<0.30
ROC	265	dog	<0.30
ROC	266	dog	<0.30
ROC	267	dog	<0.30
ROC	269	dog	<0.30
ROC	271	dog	<0.30
ROC	272	dog	<0.30
ROC	275	dog	<0.30
ROC	279	dog	<0.30
ROC	280	dog	0.57
ROC	282	dog	<0.30
ROC	285	dog	<0.30
ROC	287	dog	<0.30
ROC	289	dog	<0.30
ROC	290	dog	<0.30
ROC	291	dog	<0.30
ROC	292	dog	<0.30
ROC	295	dog	<0.30
ROC	296	dog	<0.30
ROC	297	dog	<0.30
OOM	4	egg white	<0.30
OOM	6	egg white	<0.30
OOM	10	egg white	<0.30
OOM	13	egg white	<0.30
OOM	15	egg white	<0.30
OOM	18	egg white	<0.30
OOM	20	egg white	<0.30
OOM	21	egg white	<0.30
OOM	23	egg white	<0.30
OOM	24	egg white	<0.30
OOM	26	egg white	<0.30
OOM	28	egg white	<0.30
OOM	29	egg white	<0.30
OOM	31	egg white	0.3
OOM	32	egg white	0.75
OOM	33	egg white	<0.30
OOM	35	egg white	0.51
OOM	38	egg white	<0.30
OOM	41	egg white	<0.30
OOM	42	egg white	<0.30
OOM	43	egg white	<0.30
OOM	44	egg white	<0.30
OOM	45	egg white	<0.30
OOM	47	egg white	<0.30
OOM	48	egg white	<0.30
OOM	49	egg white	<0.30
OOM	50	egg white	<0.30
OOM	51	egg white	<0.30
OOM	53	egg white	<0.30
OOM	55	egg white	<0.30
OOM	60	egg white	<0.30
OOM	62	egg white	<0.30
OOM	68	egg white	<0.30
OOM	69	egg white	0.72
OOM	70	egg white	<0.30
OOM	72	egg white	<0.30
OOM	74	egg white	<0.30
OOM	77	egg white	<0.30
OOM	78	egg white	<0.30
OOM	81	egg white	<0.30
OOM	86	egg white	<0.30
OOM	88	egg white	<0.30
OOM	90	egg white	<0.30
OOM	91	egg white	<0.30
OOM	92	egg white	<0.30
OOM	93	egg white	<0.30
OOM	98	egg white	<0.30
OOM	102	egg white	<0.30
OOM	103	egg white	<0.30
OOM	104	egg white	<0.30
ROC	201	egg white	<0.30
ROC	205	egg white	<0.30
ROC	208	egg white	<0.30
ROC	211	egg white	<0.30
ROC	213	egg white	0.87
ROC	214	egg white	<0.30
ROC	215	egg white	<0.30
ROC	218	egg white	<0.30
ROC	219	egg white	6.93
ROC	220	egg white	5.46
ROC	221	egg white	<0.30
ROC	223	egg white	<0.30
ROC	227	egg white	<0.30
ROC	228	egg white	<0.30
ROC	229	egg white	<0.30
ROC	232	egg white	<0.30
ROC	239	egg white	<0.30
ROC	240	egg white	0.57
ROC	243	egg white	<0.30
ROC	244	egg white	<0.30
ROC	245	egg white	<0.30
ROC	246	egg white	<0.30
ROC	249	egg white	<0.30
ROC	254	egg white	<0.30
ROC	256	egg white	<0.30
ROC	261	egg white	2.67
ROC	264	egg white	2.91
ROC	265	egg white	<0.30
ROC	266	egg white	<0.30
ROC	267	egg white	<0.30
ROC	269	egg white	<0.30
ROC	270	egg white	0.58
ROC	271	egg white	<0.30
ROC	272	egg white	<0.30
ROC	275	egg white	<0.30
ROC	279	egg white	<0.30
ROC	280	egg white	2.55
ROC	282	egg white	<0.30
ROC	285	egg white	<0.30
ROC	286	egg white	4.87
ROC	287	egg white	<0.30
ROC	289	egg white	<0.30
ROC	290	egg white	<0.30
ROC	291	egg white	<0.30
ROC	292	egg white	<0.30
ROC	293	egg white	5.18
ROC	295	egg white	<0.30
ROC	296	egg white	<0.30
ROC	297	egg white	<0.30
OOM	4	house dust mite	<0.30
OOM	6	house dust mite	<0.30
OOM	10	house dust mite	<0.30
OOM	13	house dust mite	<0.30
OOM	15	house dust mite	<0.30
OOM	18	house dust mite	<0.30
OOM	20	house dust mite	<0.30
OOM	21	house dust mite	<0.30
OOM	23	house dust mite	<0.30
OOM	24	house dust mite	0.39
OOM	26	house dust mite	<0.30
OOM	28	house dust mite	<0.30
OOM	29	house dust mite	<0.30
OOM	31	house dust mite	<0.30
OOM	32	house dust mite	<0.30
OOM	33	house dust mite	<0.30
OOM	35	house dust mite	<0.30
OOM	38	house dust mite	<0.30
OOM	41	house dust mite	<0.30
OOM	42	house dust mite	<0.30
OOM	43	house dust mite	<0.30
OOM	44	house dust mite	<0.30
OOM	45	house dust mite	<0.30
OOM	47	house dust mite	<0.30
OOM	48	house dust mite	<0.30
OOM	49	house dust mite	<0.30
OOM	50	house dust mite	<0.30
OOM	51	house dust mite	<0.30
OOM	53	house dust mite	<0.30
OOM	55	house dust mite	<0.30
OOM	60	house dust mite	<0.30
OOM	62	house dust mite	<0.30
OOM	68	house dust mite	<0.30
OOM	69	house dust mite	<0.30
OOM	70	house dust mite	<0.30
OOM	72	house dust mite	<0.30
OOM	74	house dust mite	<0.30
OOM	77	house dust mite	<0.30
OOM	78	house dust mite	<0.30
OOM	81	house dust mite	<0.30
OOM	86	house dust mite	<0.30
OOM	88	house dust mite	<0.30
OOM	90	house dust mite	<0.30
OOM	91	house dust mite	<0.30
OOM	92	house dust mite	<0.30
OOM	93	house dust mite	<0.30
OOM	98	house dust mite	<0.30
OOM	102	house dust mite	<0.30
OOM	103	house dust mite	<0.30
OOM	104	house dust mite	<0.30
ROC	201	house dust mite	<0.30
ROC	205	house dust mite	<0.30
ROC	208	house dust mite	<0.30
ROC	211	house dust mite	<0.30
ROC	213	house dust mite	<0.30
ROC	214	house dust mite	<0.30
ROC	215	house dust mite	<0.30
ROC	218	house dust mite	<0.30
ROC	219	house dust mite	<0.30
ROC	220	house dust mite	<0.30
ROC	221	house dust mite	<0.30
ROC	223	house dust mite	<0.30
ROC	227	house dust mite	<0.30
ROC	228	house dust mite	<0.30
ROC	229	house dust mite	<0.30
ROC	232	house dust mite	<0.30
ROC	239	house dust mite	<0.30
ROC	240	house dust mite	<0.30
ROC	243	house dust mite	<0.30
ROC	244	house dust mite	<0.30
ROC	245	house dust mite	<0.30
ROC	246	house dust mite	<0.30
ROC	249	house dust mite	<0.30
ROC	254	house dust mite	<0.30
ROC	256	house dust mite	<0.30
ROC	261	house dust mite	<0.30
ROC	264	house dust mite	<0.30
ROC	265	house dust mite	<0.30
ROC	266	house dust mite	<0.30
ROC	267	house dust mite	<0.30
ROC	269	house dust mite	<0.30
ROC	271	house dust mite	<0.30
ROC	272	house dust mite	<0.30
ROC	275	house dust mite	<0.30
ROC	279	house dust mite	<0.30
ROC	280	house dust mite	<0.30
ROC	282	house dust mite	<0.30
ROC	285	house dust mite	<0.30
ROC	287	house dust mite	<0.30
ROC	289	house dust mite	<0.30
ROC	290	house dust mite	<0.30
ROC	291	house dust mite	<0.30
ROC	292	house dust mite	<0.30
ROC	295	house dust mite	<0.30
ROC	296	house dust mite	<0.30
ROC	297	house dust mite	<0.30
OOM	4	milk	<0.30
OOM	6	milk	<0.30
OOM	10	milk	<0.30
OOM	13	milk	<0.30
OOM	15	milk	<0.30
OOM	18	milk	<0.30
OOM	20	milk	<0.30
OOM	21	milk	<0.30
OOM	23	milk	<0.30
OOM	24	milk	<0.30
OOM	26	milk	<0.30
OOM	28	milk	<0.30
OOM	29	milk	<0.30
OOM	31	milk	<0.30
OOM	32	milk	<0.30
OOM	33	milk	<0.30
OOM	35	milk	<0.30
OOM	38	milk	<0.30
OOM	41	milk	<0.30
OOM	42	milk	<0.30
OOM	43	milk	<0.30
OOM	44	milk	<0.30
OOM	45	milk	<0.30
OOM	47	milk	<0.30
OOM	48	milk	<0.30
OOM	49	milk	<0.30
OOM	50	milk	<0.30
OOM	51	milk	<0.30
OOM	53	milk	<0.30
OOM	55	milk	<0.30
OOM	60	milk	<0.30
OOM	62	milk	<0.30
OOM	68	milk	<0.30
OOM	69	milk	2.49
OOM	70	milk	<0.30
OOM	72	milk	<0.30
OOM	74	milk	<0.30
OOM	77	milk	<0.30
OOM	78	milk	<0.30
OOM	81	milk	<0.30
OOM	86	milk	<0.30
OOM	88	milk	<0.30
OOM	90	milk	<0.30
OOM	91	milk	<0.30
OOM	92	milk	<0.30
OOM	93	milk	<0.30
OOM	98	milk	<0.30
OOM	102	milk	<0.30
OOM	103	milk	<0.30
OOM	104	milk	<0.30
ROC	201	milk	<0.30
ROC	205	milk	<0.30
ROC	208	milk	<0.30
ROC	211	milk	<0.30
ROC	213	milk	0.48
ROC	214	milk	<0.30
ROC	215	milk	<0.30
ROC	218	milk	<0.30
ROC	219	milk	<0.30
ROC	220	milk	1.17
ROC	221	milk	<0.30
ROC	223	milk	<0.30
ROC	227	milk	<0.30
ROC	228	milk	<0.30
ROC	229	milk	<0.30
ROC	232	milk	<0.30
ROC	239	milk	<0.30
ROC	240	milk	<0.30
ROC	243	milk	<0.30
ROC	244	milk	<0.30
ROC	245	milk	<0.30
ROC	246	milk	<0.30
ROC	249	milk	<0.30
ROC	254	milk	<0.30
ROC	256	milk	<0.30
ROC	261	milk	<0.30
ROC	264	milk	<0.30
ROC	265	milk	<0.30
ROC	266	milk	<0.30
ROC	267	milk	<0.30
ROC	269	milk	<0.30
ROC	271	milk	<0.30
ROC	272	milk	<0.30
ROC	275	milk	<0.30
ROC	279	milk	<0.30
ROC	280	milk	2.61
ROC	282	milk	<0.30
ROC	285	milk	<0.30
ROC	287	milk	<0.30
ROC	289	milk	<0.30
ROC	290	milk	<0.30
ROC	291	milk	<0.30
ROC	292	milk	<0.30
ROC	295	milk	<0.30
ROC	296	milk	<0.30
ROC	297	milk	<0.30
OOM	4	peanut	<0.30
OOM	6	peanut	<0.30
OOM	10	peanut	<0.30
OOM	13	peanut	<0.30
OOM	15	peanut	<0.30
OOM	18	peanut	<0.30
OOM	20	peanut	<0.30
OOM	21	peanut	<0.30
OOM	23	peanut	<0.30
OOM	24	peanut	<0.30
OOM	26	peanut	<0.30
OOM	28	peanut	<0.30
OOM	29	peanut	<0.30
OOM	31	peanut	<0.30
OOM	32	peanut	<0.30
OOM	33	peanut	<0.30
OOM	35	peanut	<0.30
OOM	38	peanut	<0.30
OOM	41	peanut	<0.30
OOM	42	peanut	<0.30
OOM	43	peanut	<0.30
OOM	44	peanut	<0.30
OOM	45	peanut	<0.30
OOM	47	peanut	<0.30
OOM	48	peanut	<0.30
OOM	49	peanut	<0.30
OOM	50	peanut	<0.30
OOM	51	peanut	<0.30
OOM	53	peanut	<0.30
OOM	55	peanut	<0.30
OOM	60	peanut	<0.30
OOM	62	peanut	<0.30
OOM	68	peanut	<0.30
OOM	69	peanut	<0.30
OOM	70	peanut	<0.30
OOM	72	peanut	<0.30
OOM	74	peanut	<0.30
OOM	77	peanut	<0.30
OOM	78	peanut	<0.30
OOM	81	peanut	<0.30
OOM	86	peanut	<0.30
OOM	88	peanut	<0.30
OOM	90	peanut	<0.30
OOM	91	peanut	<0.30
OOM	92	peanut	<0.30
OOM	93	peanut	<0.30
OOM	98	peanut	<0.30
OOM	102	peanut	<0.30
OOM	103	peanut	<0.30
OOM	104	peanut	<0.30
ROC	201	peanut	<0.30
ROC	205	peanut	<0.30
ROC	208	peanut	<0.30
ROC	211	peanut	<0.30
ROC	213	peanut	<0.30
ROC	214	peanut	<0.30
ROC	215	peanut	<0.30
ROC	218	peanut	<0.30
ROC	219	peanut	<0.30
ROC	220	peanut	1.26
ROC	221	peanut	<0.30
ROC	223	peanut	<0.30
ROC	225	peanut	1.2
ROC	227	peanut	<0.30
ROC	228	peanut	<0.30
ROC	229	peanut	<0.30
ROC	232	peanut	<0.30
ROC	239	peanut	<0.30
ROC	240	peanut	<0.30
ROC	243	peanut	<0.30
ROC	244	peanut	<0.30
ROC	245	peanut	<0.30
ROC	246	peanut	<0.30
ROC	249	peanut	<0.30
ROC	254	peanut	<0.30
ROC	256	peanut	<0.30
ROC	261	peanut	0.33
ROC	264	peanut	<0.30
ROC	265	peanut	<0.30
ROC	266	peanut	<0.30
ROC	267	peanut	<0.30
ROC	269	peanut	<0.30
ROC	271	peanut	<0.30
ROC	272	peanut	<0.30
ROC	275	peanut	<0.30
ROC	279	peanut	<0.30
ROC	280	peanut	0.39
ROC	282	peanut	<0.30
ROC	285	peanut	<0.30
ROC	287	peanut	<0.30
ROC	289	peanut	<0.30
ROC	290	peanut	<0.30
ROC	291	peanut	<0.30
ROC	292	peanut	<0.30
ROC	295	peanut	<0.30
ROC	296	peanut	<0.30
ROC	297	peanut	<0.30
